# Supplementary material for: Catalytic Hydrogenation of Nitrate over Immobilized Nanocatalysts in a Multi-Phase Continuous Reaction System: System Performance, Characterization and Optimization
Source: MDPI journal article supplement (doi:10.3390/pr11092692), 2023-09-08
Supplement: s1 [file s1]

## Article

# Catalytic Hydrogenation of Nitrate over Immobilized Nanocatalysts in a Multi-Phase Continuous Reaction System: System Performance, Characterization and Optimization

Ana Sofia G. G. Santos <sup>1,2</sup>, João Restivo <sup>1,2</sup>, Carla Alexandra Orge <sup>1,2</sup>, Manuel Fernando R. Pereira <sup>1,2</sup>  
and Olívia Salomé G. P. Soares <sup>1,2,\*</sup>

<sup>1</sup> Laboratory of Separation and Reaction Engineering-Laboratory of Catalysis and Materials (LSRE-LCM), Faculty of Engineering, University of Porto, Rua Dr. Roberto Frias, 4200-465 Porto, Portugal; up201303231@edu.fe.up.pt (A.S.G.G.S.); jrestivo@fe.up.pt (J.R.); carlaorge@fe.up.pt (C.A.O.); fpereira@fe.up.pt (M.F.R.P.)

<sup>2</sup> ALiCE—Associate Laboratory in Chemical Engineering, Faculty of Engineering, University of Porto, Rua Dr. Roberto Frias, 4200-465 Porto, Portugal

\* Correspondence: salome.soares@fe.up.pt

**Citation:** Santos, A.S.G.G.; Restivo, J.; Orge, C.A.; Pereira, M.F.R.; Soares, O.S.G.P. Catalytic Hydrogenation of Nitrate over Immobilized Nanocatalysts in a Multi-Phase Continuous Reaction System: System Performance, Characterization and Optimization. *Processes* **2023**, *11*, 2692.  
<https://doi.org/10.3390/pr11092692>

Academic Editor: Hsin Chu

Received: 14 August 2023

Revised: 29 August 2023

Accepted: 1 September 2023

Published: 8 September 2023

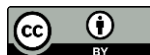

**Copyright:** © 2023 by the authors. Licensee MDPI, Basel, Switzerland. This article is an open access article distributed under the terms and conditions of the Creative Commons Attribution (CC BY) license (<https://creativecommons.org/licenses/by/4.0/>).

## Supplementary material

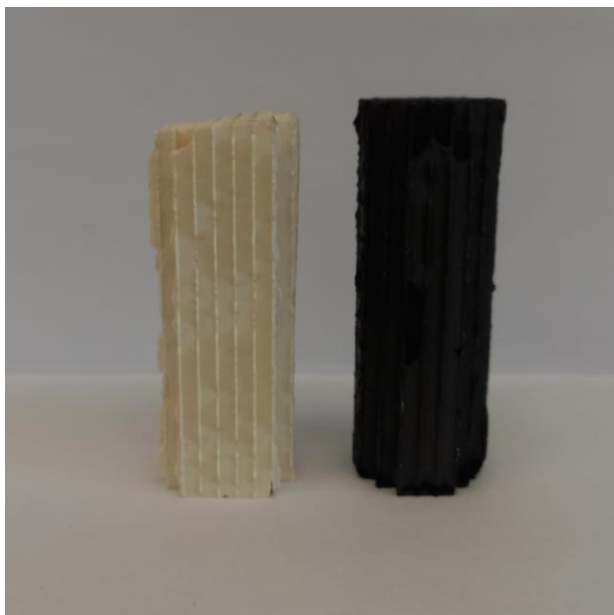

Figure S1: Macrostructured catalysts before and after coating.

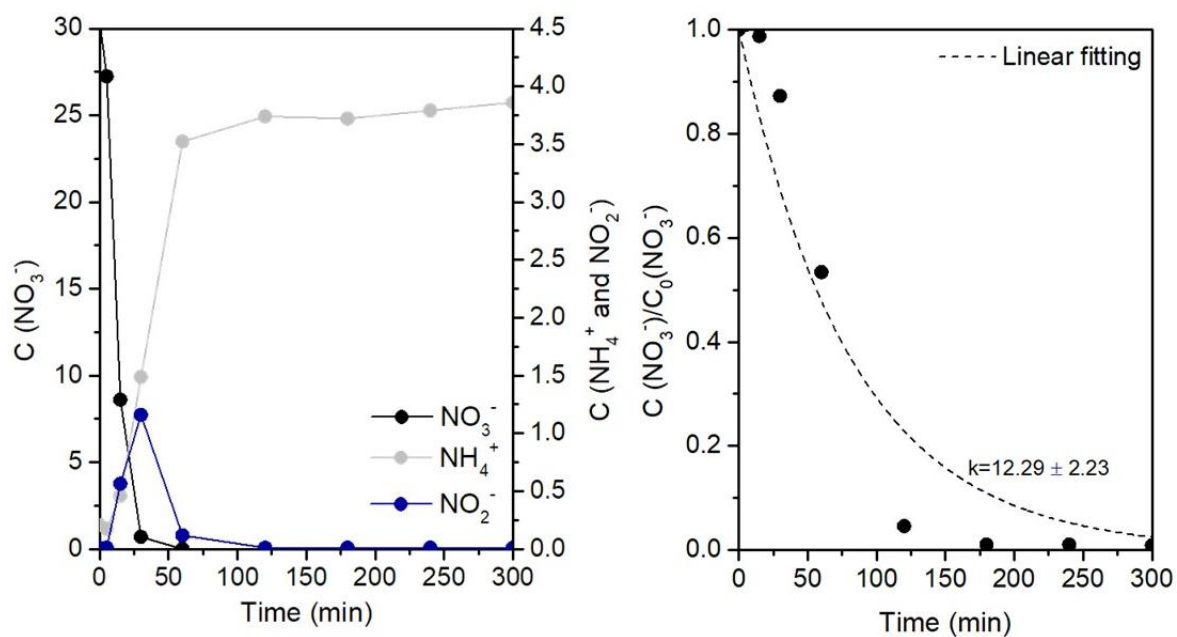

Figure S2: Catalytic results obtained with 5%Pd-2.5%Cu/CNT(BM 2h) powder catalyst in *batch* reactor ( $C_{\text{initial}}[\text{NO}_3^-] = 30 \text{ mg L}^{-1}$ ,  $200 \text{ Ncm}^3/\text{min}$  ( $\text{H}_2 + \text{CO}_2$  (1:1))).

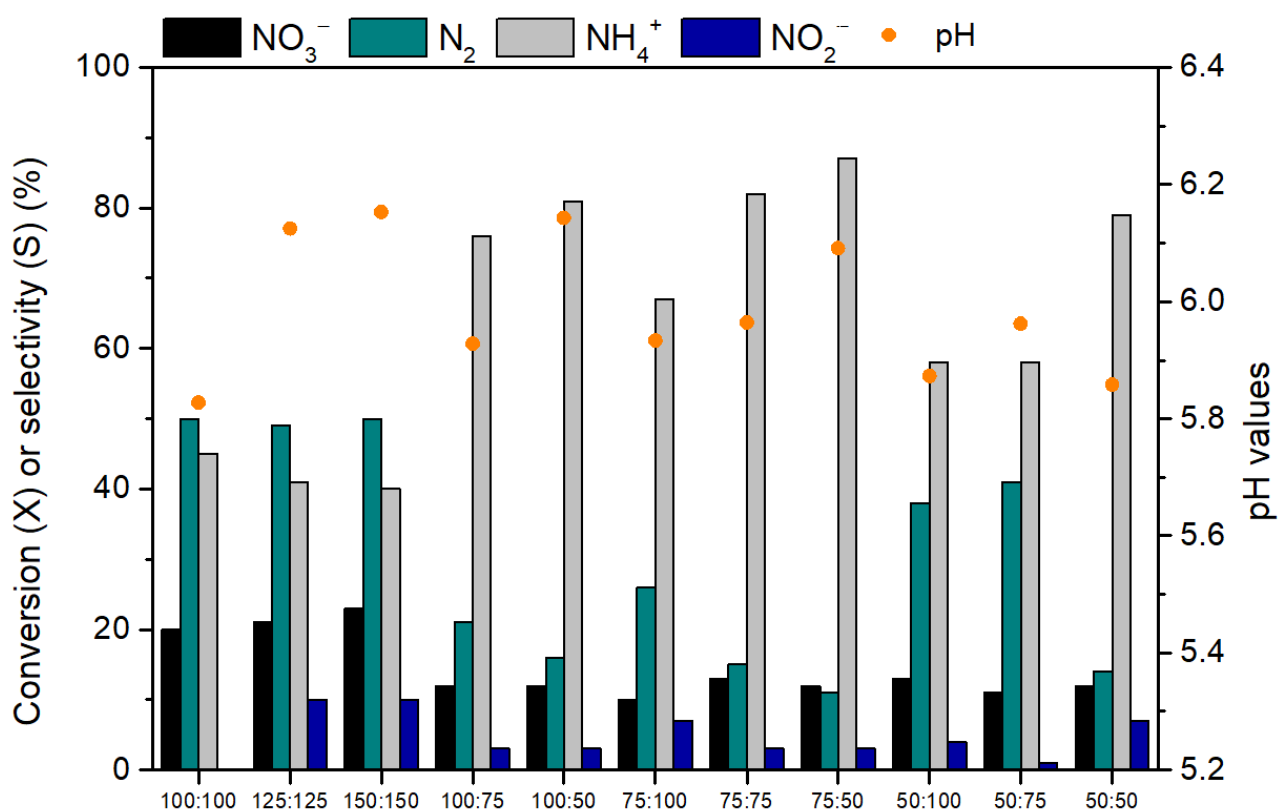

**Figure S3:**  $\text{NO}_3^-$  conversion and respective  $\text{N}_2$ ,  $\text{NH}_4^+$  and  $\text{NO}_2^-$  selectivities obtained for different gas flow rate combinations and the pH value measured at the end of reaction time ( $C_{\text{initial}}[\text{NO}_3^-]=30 \text{ mg L}^{-1}$ ,  $Q_{\text{liquid}}=10 \text{ mL min}^{-1}$ , and Pd-Cu/WCP\_wash catalyst).

**Disclaimer/Publisher's Note:** The statements, opinions and data contained in all publications are solely those of the individual author(s) and contributor(s) and not of MDPI and/or the editor(s). MDPI and/or the editor(s) disclaim responsibility for any injury to people or property resulting from any ideas, methods, instructions or products referred to in the content.
